# Supplementary material for: Tether-free optogenetic control of insulin secretion using an upconversion nanoparticle-doped hydrogel platform
Source: Royal Society of Chemistry journal article supplement (doi:10.1039/d2bm01890j), 2023-01-01
Supplement: d2bm01890j1.pdf [file d2bm01890j1.pdf]

## **Tether-free Optogenetic Control of Insulin Secretion by Upconversion Nanoparticles Doped Hydrogel Platform**

Akshaya Bansal,<sup>a,†</sup> Jing Zhang,<sup>b,†</sup> Qi Lu,<sup>c</sup> Qingsong Mei,<sup>c,\*</sup> Yong Zhang<sup>a,d,\*</sup>

<sup>a</sup> Department of Biomedical Engineering, Faculty of Engineering, National University of Singapore, 117576 Singapore

<sup>b</sup> School of Environmental and Chemical Engineering, Shanghai University, Shanghai 200444, China

<sup>c</sup> Department of Medical Biochemistry and Molecular Biology, School of Medicine, Jinan University, Guangzhou, Guangdong 510632, China, E-mail: qsmei@jnu.edu.cn

<sup>d</sup> NUS Graduate School for Integrative Sciences & Engineering, National University of Singapore, 117456 Singapore, Email: biezy@nus.edu.sg

<sup>†</sup> These authors contribute equally.

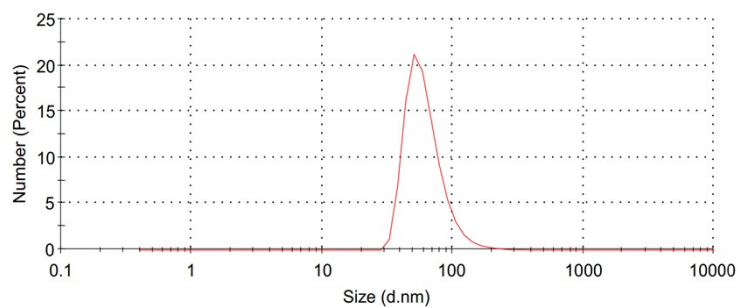

**Figure S1.** DLS size distribution of the silica coated UCNPs.

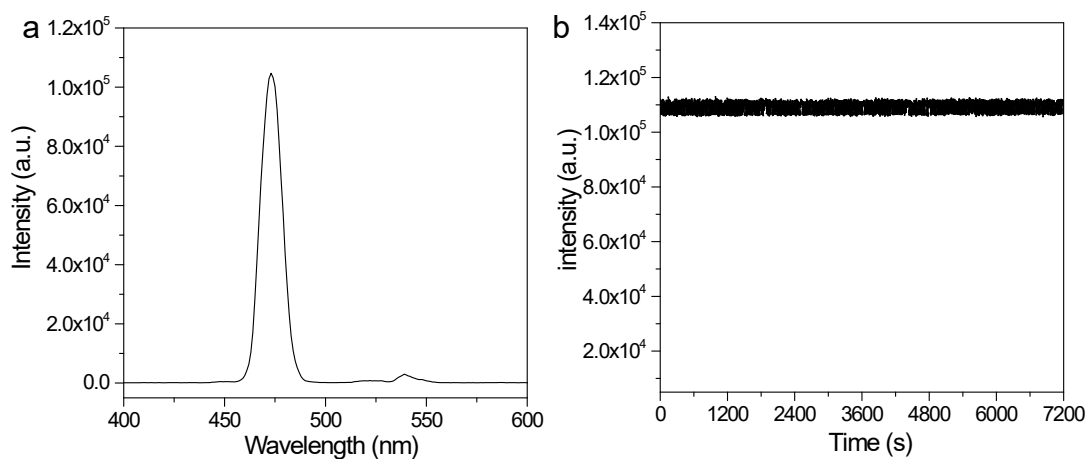

**Figure S2.** a) Luminescence spectrum of the silica-coated UCNPs. b) The luminescence variations of silica-coated UCNPs when irradiated at a 2.5 W/cm<sup>2</sup> of 980 nm laser for 2h, and the fluorescence intensity of emission peak at 470 nm was recorded with an interval of 1 s.

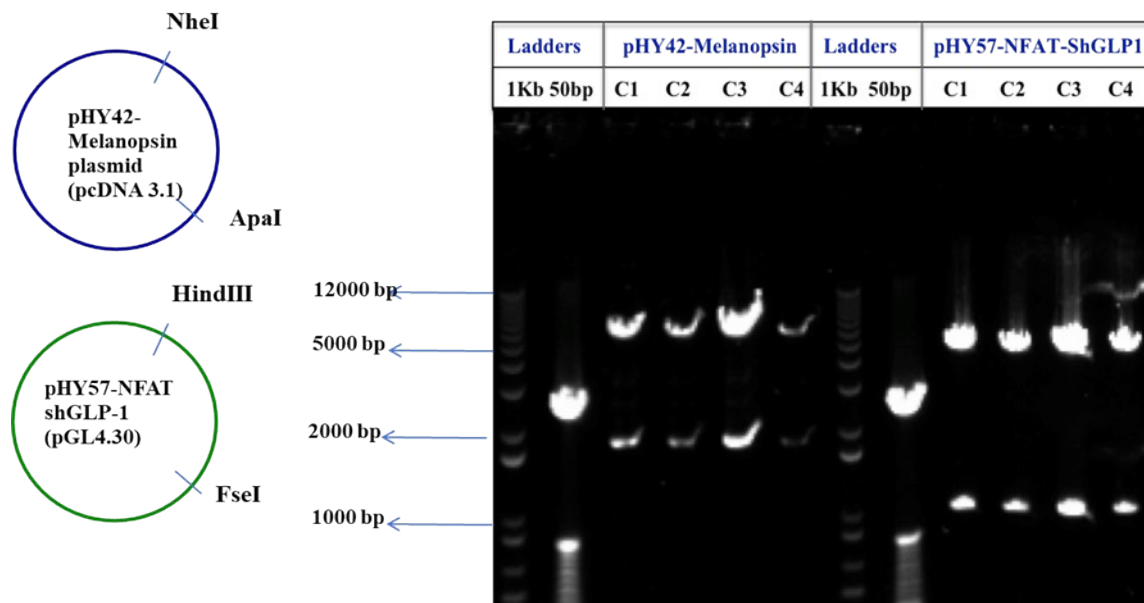

**Figure S3.** Gel electrophoresis to show DNA fragments after restriction digestion to confirm presence of inserts.

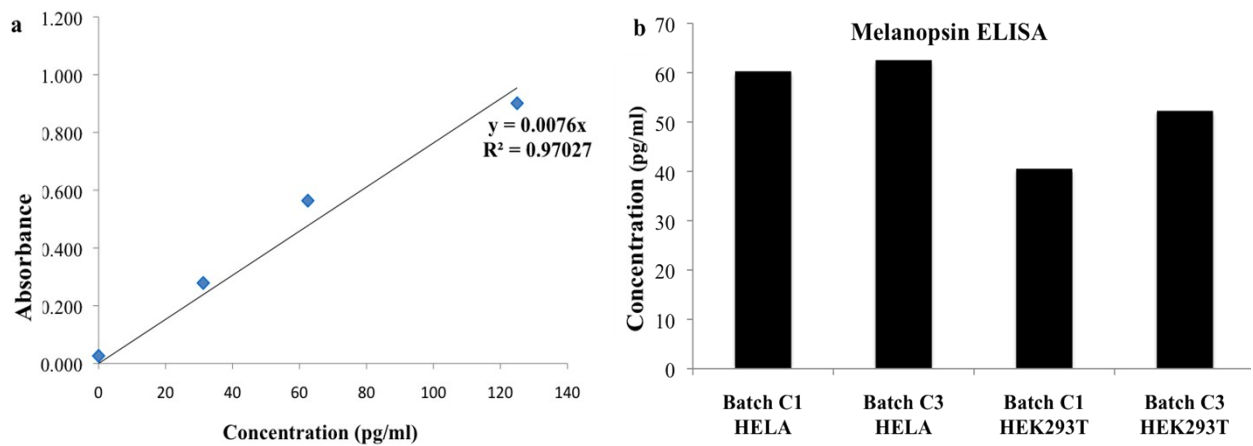

**Figure S4.** Standard curve for melanopsin (a) and graph showing melanopsin expression due to randomly selected plasmid batches C1 and C3 in HELA and HEK293T cells (b).

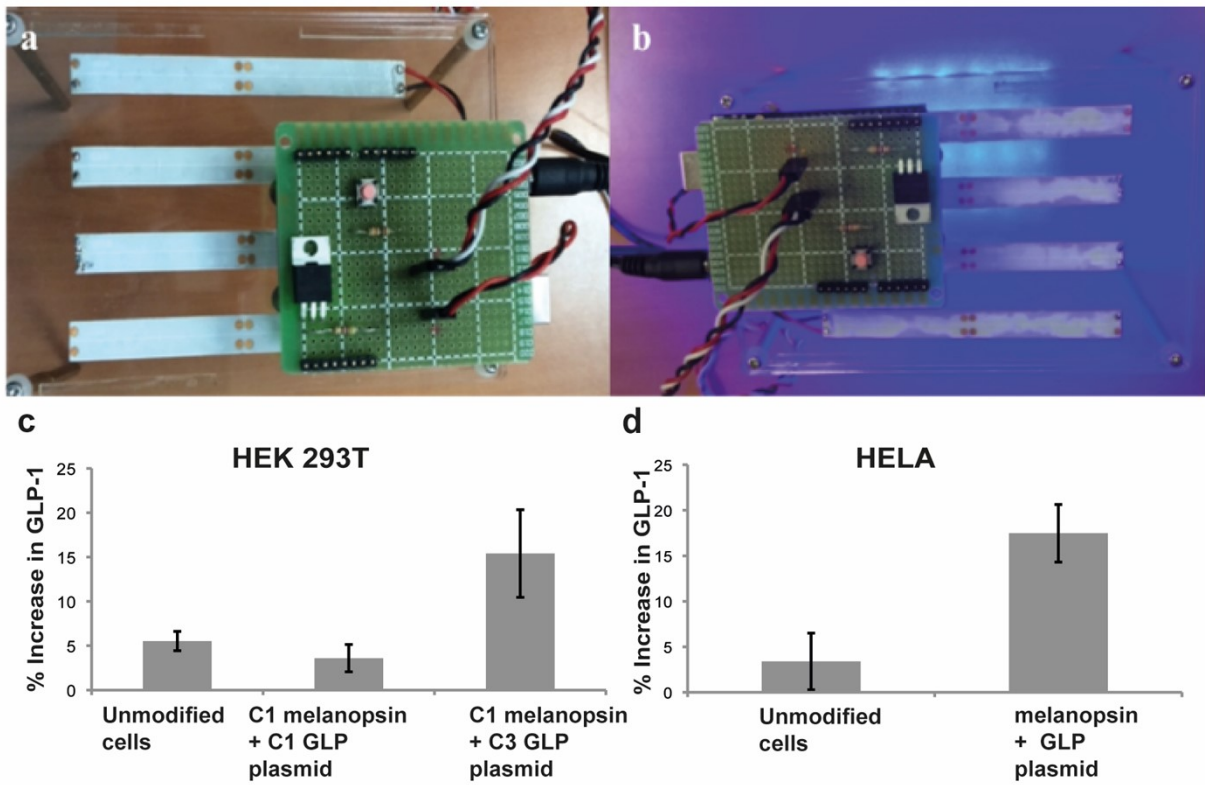

**Figure S5.** Customized blue LED array to deliver light pulses, off mode (a) and on mode (b). Graphs showing increasing in GLP-1 production in HEK293T and HELA cells, (c) and (d) relative to GLP-1 produced in the absence of light.

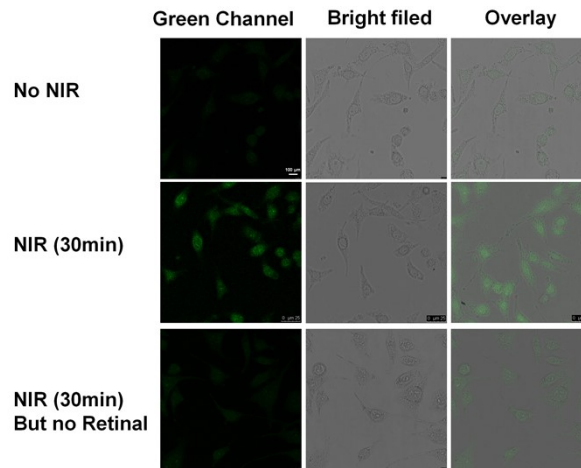

**Figure S6.** Fluorescent images of HEK293T cells to indicated the influx of calcium ions under different conditions.

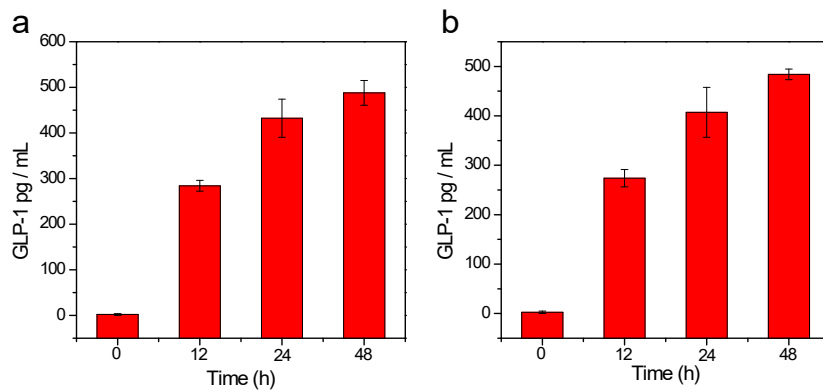

**Figure S7.** GLP-1 generation amount during different time incubations after the hydrogel was illuminated with NIR light (980 nm, 2.5W/cm<sup>2</sup>) exposure for 2 h. a) Freshly-prepared hydrogel. b) After the hydrogel was stored for two weeks.
